# Supplementary material
Source: publisher site journal article supplement (https://www.spandidos-publications.com/4708/downloadSupplementary)

Figure S1. Association of microRNA-126 expression with type 2 diabetes mellitus risk in 7 epidemiological studies (5 analytical and 2 cross-sectional studies). The pooled estimates were obtained using a random-effects model, and the dotted lines represent the corresponding pooled results. RR, relative ratio.

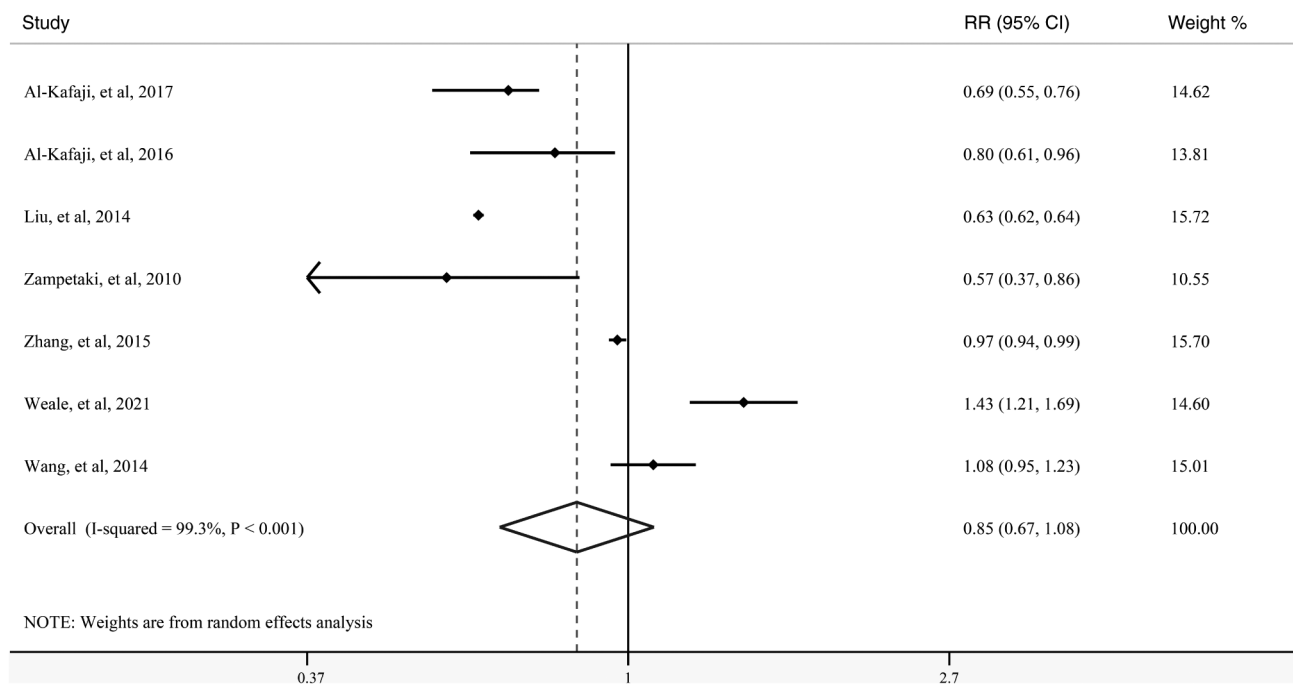

Figure S2. Begg's funnel plot for the association of microRNA-126 with type 2 diabetes mellitus risk. Asymmetry suggested the presence of a potential publication bias.

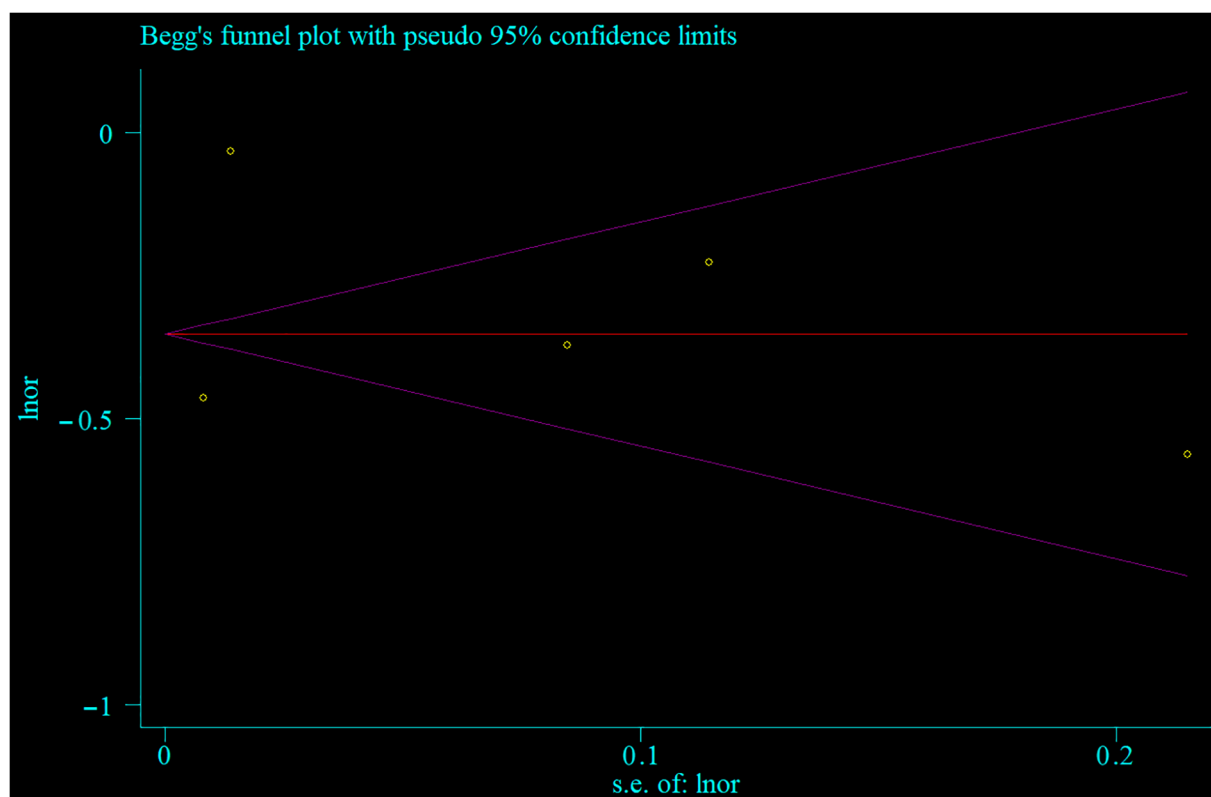

Figure S3. Begg's funnel plot for the association of miR-126 and miR-122 with FBG level and HOMA-IR index. (A) A total of 22 studies for the association of miR-126 with FBG level. (B) A total of 10 studies for the association of miR-122 with FBG level. (C) A total of 9 studies for the association of miR-126 with HOMA-IR index. (D) A total of 9 studies for the association of miR-122 with HOMA-IR index. Asymmetry suggested the presence of a potential publication bias. miR, microRNA; FBG, fasting blood glucose; HOMA-IR, homeostasis model assessment of insulin resistance.

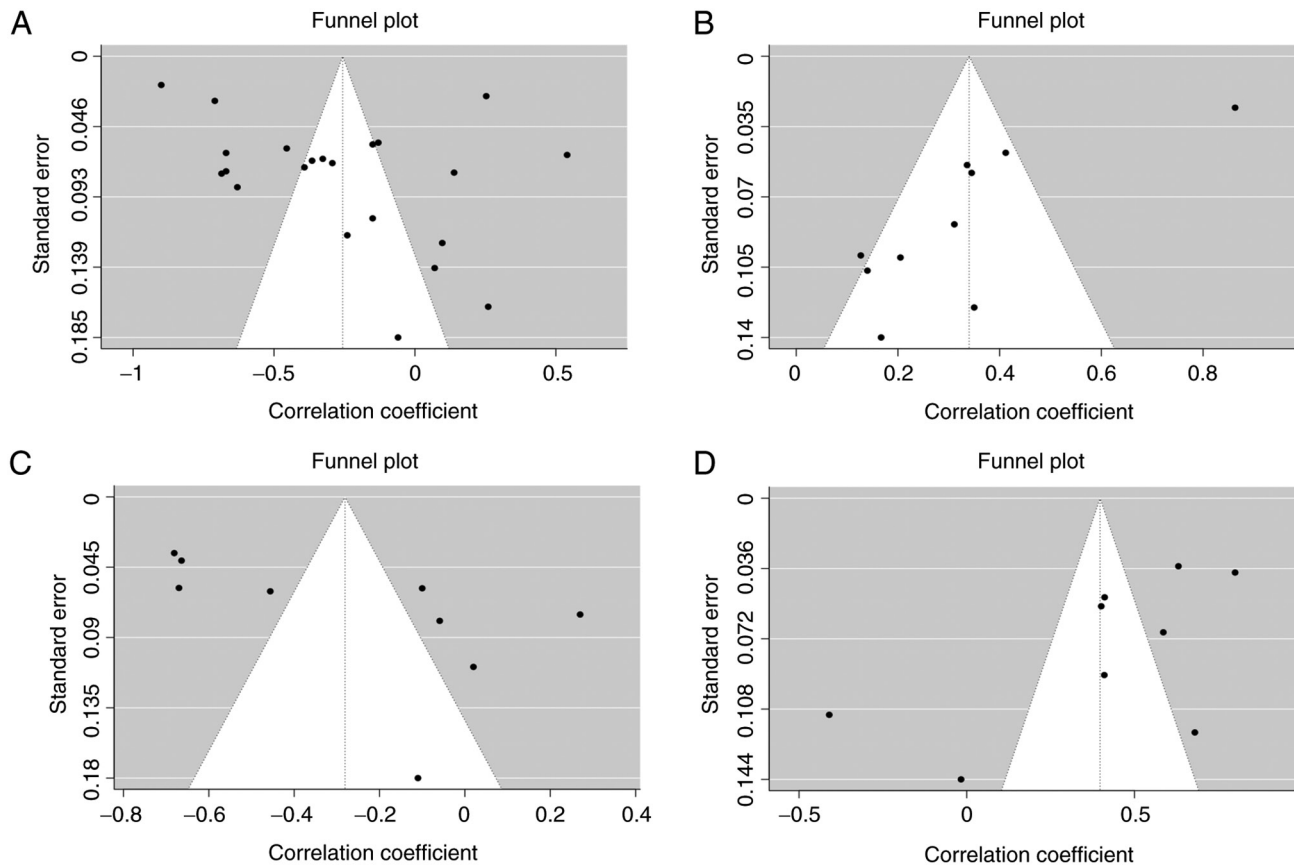

Supplement: Supplementary file 1 [file downloadSupplementary]
